# Supplementary material for: Differences in the Quality, Yield, and Soil Microecology of Ginseng in Different Planting Environments
Source: MDPI journal article supplement (doi:10.3390/horticulturae9040520), 2023-04-21
Supplement: s1 [file s1]

Archive with 2 entries (2 files):
- supplementary figures.pdf
- supplementary tables.pdf
