# Supplementary material for: Differences in the Quality, Yield, and Soil Microecology of Ginseng in Different Planting Environments
Source: MDPI journal article supplement (doi:10.3390/horticulturae9040520), 2023-04-21
Supplement: s1 [file s1 › supplementary figures.pdf]

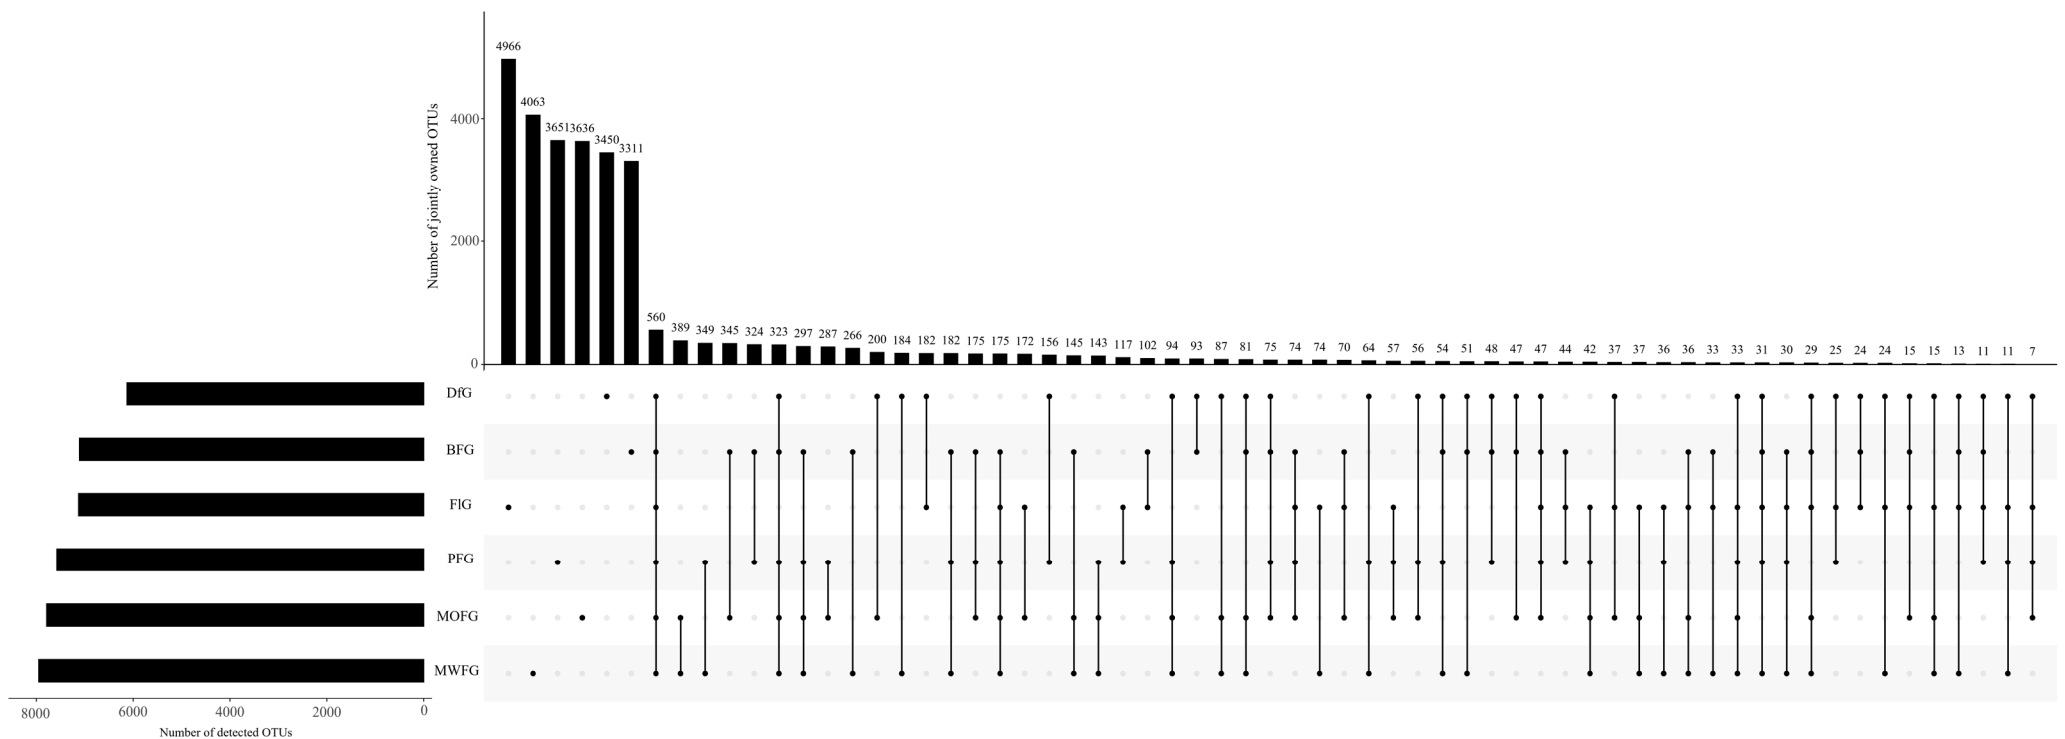

**Figure S1.**UpSet diagram of bacterial OTU abundance. MOFG, Mongolian oak forest ginseng; BFG, birch forest ginseng; MWFG, miscellaneous wood forest ginseng; PFG, poplar forest ginseng. FIG, farmland ginseng; DfG, deforestation ginseng.

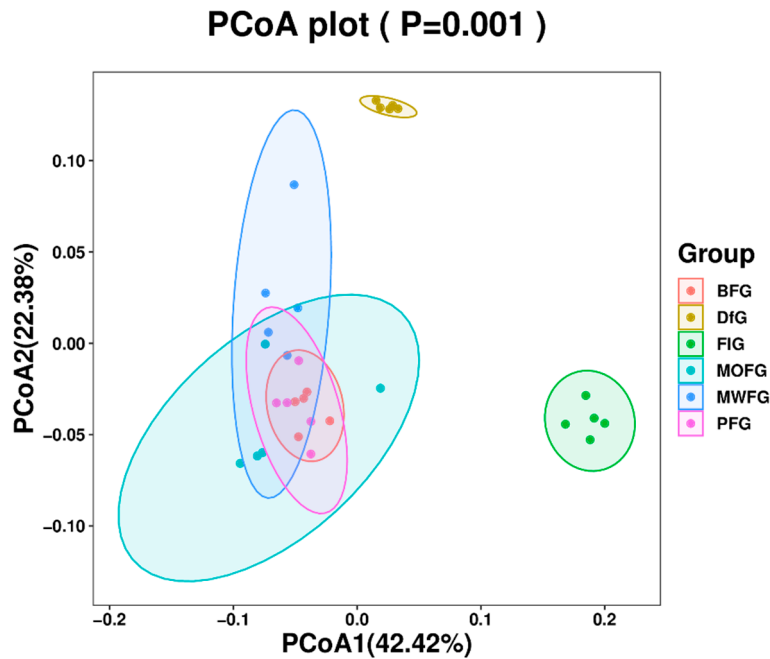

**Figure S2.** PCoA analysis of bacterial OTU abundance. MOFG, Mongolian oak forest ginseng; BFG, birch forest ginseng; MWFG, miscellaneous wood forest ginseng; PFG, poplar forest ginseng. FIG, farmland ginseng; DfG, deforestation ginseng.

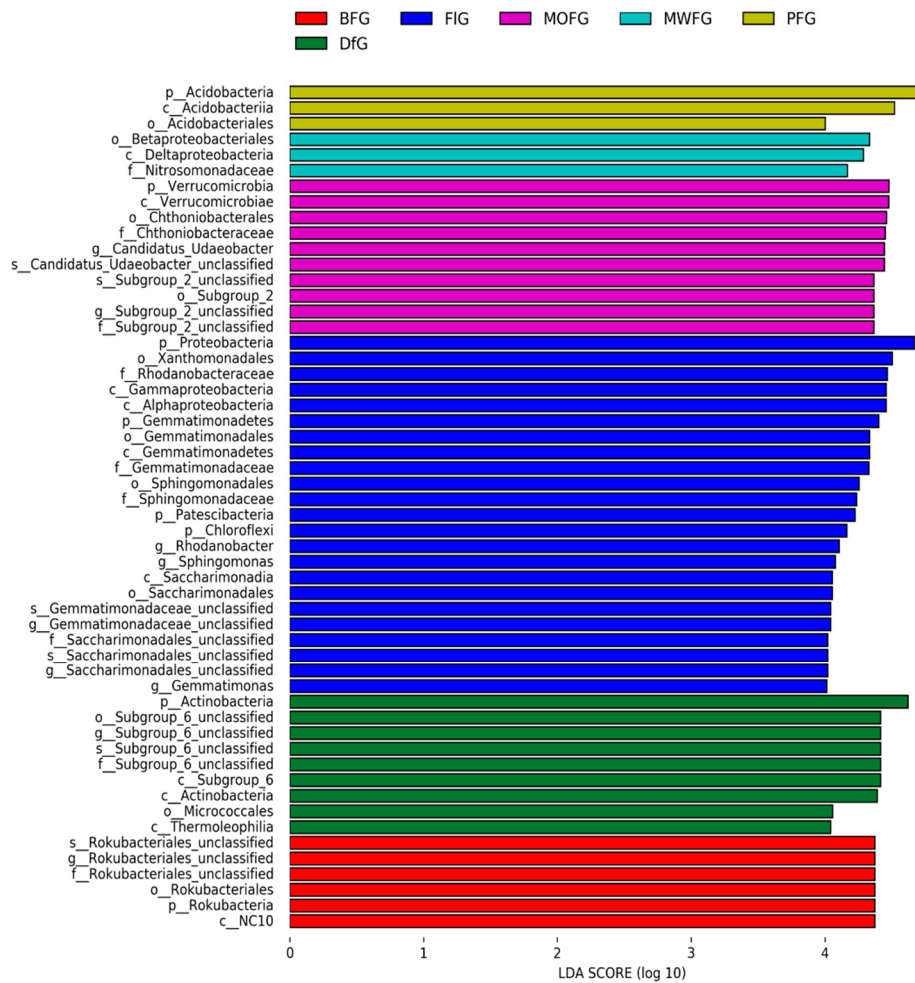

**Figure S3.** LEfSe-based linear discriminant analysis (LDA) (LDA discrimination table, LDA > 4.0). MOFG, Mongolian oak forest ginseng; BFG, birch forest ginseng; MWFG, miscellaneous wood forest ginseng; PFG, poplar forest ginseng. FIG, farmland ginseng; DfG, deforestation ginseng. LEfSe-based linear discriminant analysis (LDA) on the samples according to the taxonomic composition and different grouping conditions to determine the communities or species that had significant differences in the sample division.
