# Supplementary material for: Differences in the Quality, Yield, and Soil Microecology of Ginseng in Different Planting Environments
Source: MDPI journal article supplement (doi:10.3390/horticulturae9040520), 2023-04-21
Supplement: s1 [file s1 › supplementary tables.pdf]

Table S1 Gradient elution conditions.

| Time (min) | Elution gradient |
|------------|------------------|
| 0~40       | 82%~79%A         |
| 40~42      | 79%~75%A         |
| 42~48      | 75%~68%A         |
| 48~72      | 68%~63%A         |
| 72~79      | 63%~51%A         |
| 79~82      | 82%~82%A         |

Table S2 Ginsenoside standard curve and linear range.

| Composition | Equation           | R <sup>2</sup> | Linear range (μg·mL <sup>-1</sup> ) |
|-------------|--------------------|----------------|-------------------------------------|
| Rg1         | $Y=35.572X+49.594$ | 0.9994         | 20~200                              |
| Re          | $Y=17.156X+54.901$ | 0.9993         | 20~200                              |
| Rf          | $Y=10.174X+5.632$  | 0.9995         | 10~100                              |
| Rg2         | $Y=69.952X-28.807$ | 0.9988         | 40~400                              |
| Rc          | $Y=48.479X-10.453$ | 0.9994         | 40~400                              |
| Rb1         | $Y=39.498X-27.238$ | 0.9994         | 40~400                              |
| Rb2         | $Y=16.629X+5.053$  | 0.9983         | 20~200                              |
| Rb3         | $Y=11.230X-7.003$  | 0.9993         | 10~100                              |
| Rd          | $Y=27.398X-19.852$ | 0.9991         | 20~200                              |

Table S3 Soil chemical properties

| Forest Type | pH                           | EC (μS·cm <sup>-1</sup> )  | AHN (mg·kg <sup>-1</sup> ) | AP (mg·kg <sup>-1</sup> ) | AK (mg·kg <sup>-1</sup> )   | OM (%)                    |
|-------------|------------------------------|----------------------------|----------------------------|---------------------------|-----------------------------|---------------------------|
| MOFG        | 5.38±0.17 <sup>a</sup>       | 55.75±22.13 <sup>c</sup>   | 256.64±38.73 <sup>b</sup>  | 13.64±1.88 <sup>b</sup>   | 153.62±38.95 <sup>bcd</sup> | 10.55±0.64 <sup>c</sup>   |
| BFG         | 4.98±0.23 <sup>bc</sup>      | 44.03±6.59 <sup>c</sup>    | 295.02±15.99 <sup>ab</sup> | 13.32±2.76 <sup>b</sup>   | 136.29±4.43 <sup>cde</sup>  | 13.54±2.31 <sup>a</sup>   |
| MWFG        | 5.13±0.08 <sup>b</sup>       | 52.85±7.04 <sup>c</sup>    | 336.29±61.25 <sup>a</sup>  | 15.64±2.31 <sup>b</sup>   | 182.52±28.42 <sup>b</sup>   | 13.21±1.64 <sup>a</sup>   |
| PFG         | 4.86±0.11 <sup>c</sup>       | 44.93±3.24 <sup>c</sup>    | 332.96±22.67 <sup>a</sup>  | 13.83±0.94 <sup>b</sup>   | 123.48±8.54 <sup>de</sup>   | 13.51±0.90 <sup>a</sup>   |
| DfG         | 5.16±0.19 <sup>b</sup>       | 261.72±10.31 <sup>b</sup>  | 249.38±7.11 <sup>b</sup>   | 15.87±2.16 <sup>b</sup>   | 231.95±9.52 <sup>a</sup>    | 8.58±0.91 <sup>c</sup>    |
| FIG         | 4.48±0.07 <sup>d</sup>       | 291.45±15.22 <sup>a</sup>  | 270.35±8.53 <sup>b</sup>   | 72.57±1.73 <sup>a</sup>   | 161.63±2.19 <sup>bc</sup>   | 10.87±0.63 <sup>bc</sup>  |
| Forest Type | Ca (mg·kg <sup>-1</sup> )    | Mg (mg·kg <sup>-1</sup> )  | Mn (mg·kg <sup>-1</sup> )  | Fe (mg·kg <sup>-1</sup> ) | Cu (mg·kg <sup>-1</sup> )   | Zn (mg·kg <sup>-1</sup> ) |
| MOFG        | 4062.94±240.29 <sup>bc</sup> | 542.77±40.11 <sup>ab</sup> | 41.94±13.24 <sup>a</sup>   | 71.43±31.26 <sup>bc</sup> | 0.57±0.25 <sup>b</sup>      | 2.81±0.8 <sup>ab</sup>    |
| BFG         | 3814.43±143.08 <sup>c</sup>  | 526.15±34.63 <sup>ab</sup> | 44.27±10.64 <sup>a</sup>   | 116.41±26.07 <sup>a</sup> | 0.63±0.19 <sup>b</sup>      | 1.67±0.92 <sup>b</sup>    |
| MWFG        | 4647.51±558.49 <sup>a</sup>  | 561.07±50.21 <sup>a</sup>  | 38.06±10.13 <sup>ab</sup>  | 116.51±23.5 <sup>a</sup>  | 0.85±0.28 <sup>ab</sup>     | 4.29±2.16 <sup>a</sup>    |
| PFG         | 4266.72±180.53 <sup>ab</sup> | 536.81±12.77 <sup>ab</sup> | 39.53±3.24 <sup>ab</sup>   | 118.62±21.9 <sup>a</sup>  | 0.75±0.17 <sup>ab</sup>     | 2.86±1.54 <sup>ab</sup>   |
| DfG         | 3709.84±51.74 <sup>c</sup>   | 505.54±9.31 <sup>b</sup>   | 29.75±0.05 <sup>c</sup>    | 71.75±0.63 <sup>bc</sup>  | 0.99±0.25 <sup>a</sup>      | 0.94±0.03 <sup>b</sup>    |
| FIG         | 3993.04±51.74 <sup>bc</sup>  | 501.28±9.41 <sup>b</sup>   | 39.26±1.15 <sup>ab</sup>   | 51.86±0.97 <sup>c</sup>   | 0.82±0.03 <sup>ab</sup>     | 1.96±0.08 <sup>b</sup>    |

Note: EC: electrical conductivity; AHN, alkali hydrolysable nitrogen; AP, available phosphorus; AK, available potassium; OM, organic matter; MOFG, Mongolian oak forest ginseng; BFG, birch forest ginseng; MWFG, miscellaneous wood forest ginseng; PFG, poplar forest ginseng; FIG, farmland ginseng; DfG, deforestation ginseng. Values are means of five replicates ± SE. Treatment means with different letters are significantly different ( $p < 0.05$ ).

Table S4 Soil enzyme activities

| Forest Type | S-SC<br>( $\text{mg}\cdot\text{g}^{-1}\cdot\text{d}^{-1}$ ) | S-ACP<br>( $\text{mg}\cdot\text{g}^{-1}\cdot\text{d}^{-1}$ ) | S-UE<br>( $\mu\text{g}\cdot\text{g}^{-1}\cdot\text{d}^{-1}$ ) | S-CAT<br>( $\mu\text{mol}\cdot\text{g}^{-1}\cdot\text{d}^{-1}$ ) |
|-------------|-------------------------------------------------------------|--------------------------------------------------------------|---------------------------------------------------------------|------------------------------------------------------------------|
| MOFG        | 8.13±1.75 <sup>b</sup>                                      | 17.04±0.21 <sup>c</sup>                                      | 282.07±19.37 <sup>c</sup>                                     | 102.09±0.36 <sup>a</sup>                                         |
| BFG         | 7.66±1.7 <sup>bc</sup>                                      | 22.47±0.49 <sup>a</sup>                                      | 242.04±7.28 <sup>c</sup>                                      | 100.86±1.27 <sup>a</sup>                                         |
| MWFG        | 12.91±2.69 <sup>a</sup>                                     | 20.45±2.36 <sup>ab</sup>                                     | 437.86±57.75 <sup>b</sup>                                     | 86.01±1.93 <sup>bc</sup>                                         |
| PFG         | 7.16±1.07 <sup>bc</sup>                                     | 20.04±2.40 <sup>ab</sup>                                     | 275.16±40.04 <sup>c</sup>                                     | 84.75±0.25 <sup>bc</sup>                                         |
| DfG         | 6.58±0.24 <sup>c</sup>                                      | 18.54±1.95 <sup>bc</sup>                                     | 610.25±30.36 <sup>a</sup>                                     | 81.41±5.81 <sup>c</sup>                                          |
| FIG         | 4.75±0.15 <sup>d</sup>                                      | 12.71±1.31 <sup>d</sup>                                      | 604.66±68.94 <sup>a</sup>                                     | 84.94±3.22 <sup>bc</sup>                                         |

Tote: S-SC, soil sucrose; S-ACP, soil acid phosphatase; S-UE, soil urease; S-CAT, soil catalase; MOFG, Mongolian oak forest ginseng; BFG, birch forest ginseng; MWFG, miscellaneous wood forest ginseng; PFG, poplar forest ginseng; FIG, farmland ginseng; DfG, deforestation ginseng. FIG, farmland ginseng; DfG, deforestation ginseng. Values are means of five replicates ± SE. Treatment means with different letters are significantly different ( $p < 0.05$ ).
